# Supplementary material for: Personal preferences of participation in fall prevention programmes: a descriptive study
Source: PubMed Central journal article supplement (PMC7254764; doi:10.1186/s12877-020-01586-9), 2020-05-28
Supplement: 12877_2020_1586_MOESM1_ESM.pdf [file 12877_2020_1586_MOESM1_ESM.pdf]

**Additional file 1** Classification of Follow-up Characteristics.

| Questions                                                                                                          | Answers                                                                                              | Classification                                                                                                                                                   |
|--------------------------------------------------------------------------------------------------------------------|------------------------------------------------------------------------------------------------------|------------------------------------------------------------------------------------------------------------------------------------------------------------------|
| Did you get started with the fall prevention programme?                                                            | 1. Yes<br>2. No                                                                                      |                                                                                                                                                                  |
| How often did you perform actions of the fall prevention programme?                                                | 1. Daily<br>2. Multiple times a week<br>3. Once a week<br>4. Less than once a week                   | Daily or multiple times a week is classified as "Frequent participation".<br>Once a week or less than once a week is classified as "Non-frequent participation". |
| How much did you like the programme?                                                                               | 1. Not nice at all<br>2. A little nice<br>3. Pretty nice<br>4. Very nice                             | Not nice at all and a little nice is classified as "Did not like it"<br>Pretty nice and very nice is classified as "Liked it".                                   |
| How useful did you find the programme?                                                                             | 1. Not useful at all<br>2. A little useful<br>3. Pretty useful<br>4. Very useful                     | Not useful at all and a little useful is classified as "Not useful".<br>Pretty useful and very useful is classified as "Useful".                                 |
| Since I have participated in the falls prevention programme, I am more aware of my fall risk.                      | 1. Strongly disagree<br>2. Disagree<br>3. Neither agree or disagree<br>4. Agree<br>5. Strongly agree | Strongly disagree, disagree and neither agree or disagree is classified as "Disagree".<br>Agree and strongly agree is classified as "Agree".                     |
| Since I have participated in the falls prevention programme, I feel myself more secure while standing and walking. | 1. Strongly disagree<br>2. Disagree<br>3. Neither agree or disagree<br>4. Agree<br>5. Strongly agree | Strongly disagree, disagree and neither agree or disagree is classified as "Disagree".<br>Agree and strongly agree is classified as "Agree".                     |
| Since I have participated in the falls prevention programme, I exercise more often.                                | 1. Strongly disagree<br>2. Disagree<br>3. Neither agree or disagree<br>4. Agree<br>5. Strongly agree | Strongly disagree, disagree and neither agree or disagree is classified as "Disagree".<br>Agree and strongly agree is classified as "Agree".                     |
