# Supplementary material for: Personal preferences of participation in fall prevention programmes: a descriptive study
Source: PubMed Central journal article supplement (PMC7254764; doi:10.1186/s12877-020-01586-9), 2020-05-28
Supplement: 12877_2020_1586_MOESM2_ESM.pdf [file 12877_2020_1586_MOESM2_ESM.pdf]

**Additional file 2** Baseline Characteristics of Responders and Non-Responders

| Characteristics                 | Total (n=222)           | Responders<br>(n=130) | Non-responders<br>(n=92) | P-value    |
|---------------------------------|-------------------------|-----------------------|--------------------------|------------|
|                                 | mean ± SD               | mean ± SD             | mean ± SD                | T-test     |
| Age                             | 79.9 ± 7.2 <sup>a</sup> | 80.7 ± 7.2            | 78.7 ± 7.1 <sup>b</sup>  | .039       |
|                                 | n (%)                   | n (%)                 | n (%)                    | Chi-square |
| Female                          | 165 (74.3)              | 100 (76.9)            | 65 (70.7)                | .292       |
| Living alone                    | 156 (70.3)              | 98 (75.4)             | 58 (63)                  | .048       |
| Elevated fall risk <sup>1</sup> | 163 (73.4)              | 98 (75.4)             | 65 (70.7)                | .432       |

Note: SD: Standard deviation; <sup>1</sup> The fall risk test is determined an elevated fall risk when older adults were fallen in the last 12 months, or had mobility problems and a fear of falling. <sup>a</sup>: n=219, <sup>b</sup>: n=89

1. VeiligheidNL. Valanalyse screeningstool valrisico voor de eerstelijnszorg [fall analysis, fall risk screening tool for primary care. In dutch]

<https://intranet.onzehuisartsen.nl/file/download/default/A0990575496919D58AF03796C9263DFC/VNL-valanalyse-2017-ONLINE.pdf>
